# Supplementary material for: Prevalence and Diversity of Avian Haematozoan Parasites in Wetlands of Bangladesh
Source: Hindawi journal article supplement (doi:10.1155/2014/493754), 2014-01-01
Supplement: f1 [file 493754.f1.pdf]

**Supplementary file 1:** Accession numbers of the Parasite slides deposited in U.S. National Parasite Collection (USNPC), Beltsville, MD 20705, USA

|                 |                                               |
|-----------------|-----------------------------------------------|
| USNPC 107319.00 | <i>Haemoproteus pastoris</i>                  |
| USNPC 107320.00 | <i>Haemoproteus scolopaci</i>                 |
| USNPC 107321.00 | <i>Haemoproteus plataleae</i>                 |
| USNPC 107322.00 | <i>Haemoproteus greineri</i>                  |
| USNPC 107323.00 | <i>Haemoproteus nettionis</i>                 |
| USNPC 107324.00 | <i>Plasmodium (Haemoamoeba) relictum</i>      |
| USNPC 107325.00 | <i>Plasmodium (Haemoamoeba) lutzi</i>         |
| USNPC 107326.00 | <i>Plasmodium (Giovannolaia) polare</i>       |
| USNPC 107327.00 | <i>Plasmodium (Giovannolaia) circumflexum</i> |
| USNPC 107328.00 | <i>Plasmodium (Giovannolaia) lophurae</i>     |
| USNPC 107329.00 | <i>Leucocytozoon</i> sp.                      |
| USNPC 107330.00 | <i>Paronchocerca</i> sp.                      |
